# Supplementary material for: Biophysics of Malarial Parasite Exit from Infected Erythrocytes
Source: PubMed Central journal article supplement (PMC3117855; doi:10.1371/journal.pone.0020869), 2011-06-17

Figure. S1

A

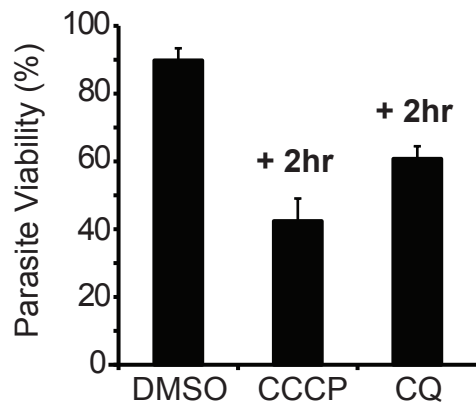

B

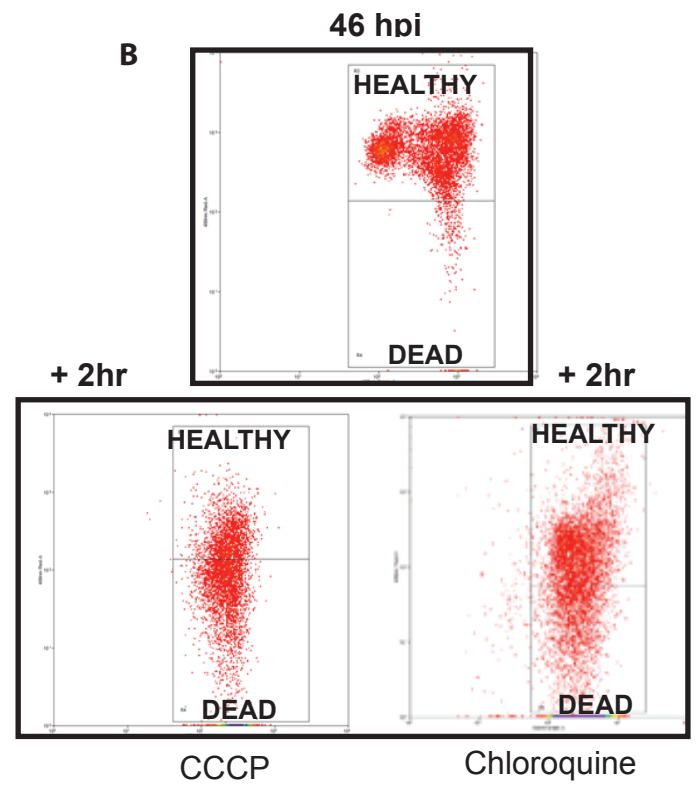

C

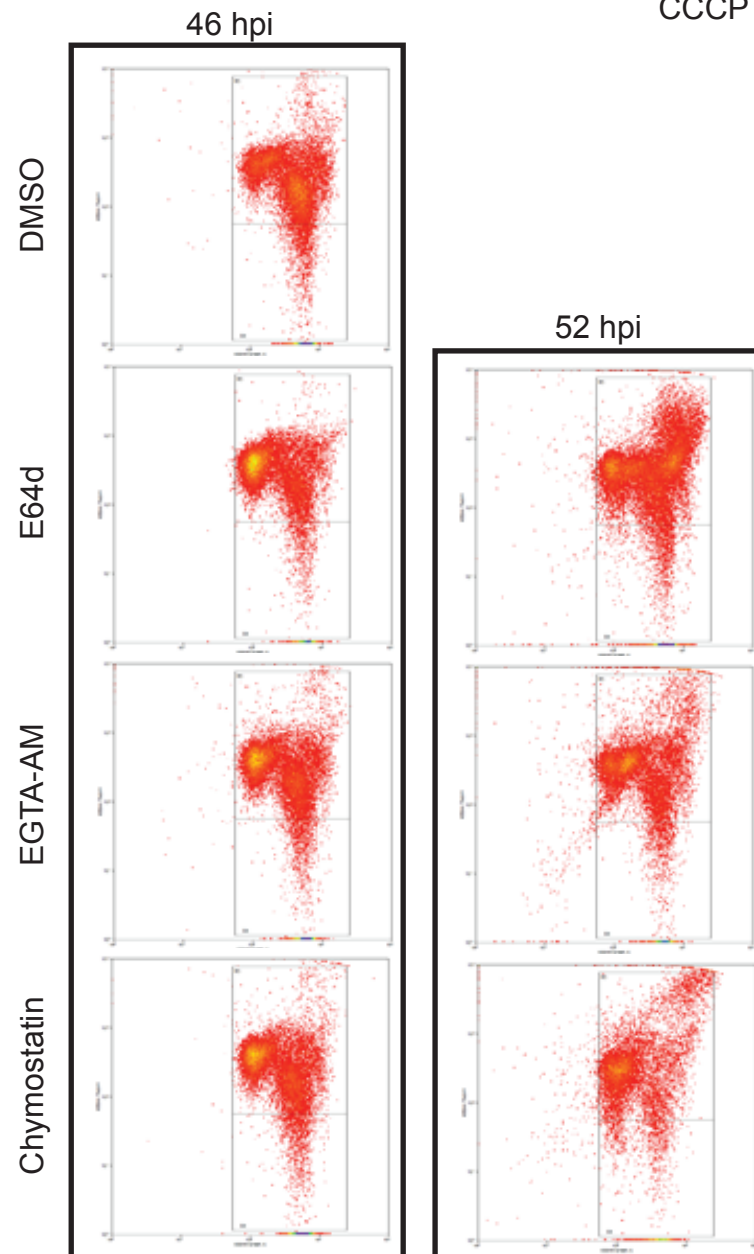

Supplement: pone.0020869.s001.pdf [file pone.0020869.s001.pdf]
