# Supplementary material for: Biophysics of Malarial Parasite Exit from Infected Erythrocytes
Source: PubMed Central journal article supplement (PMC3117855; doi:10.1371/journal.pone.0020869), 2011-06-17

Figure. S2

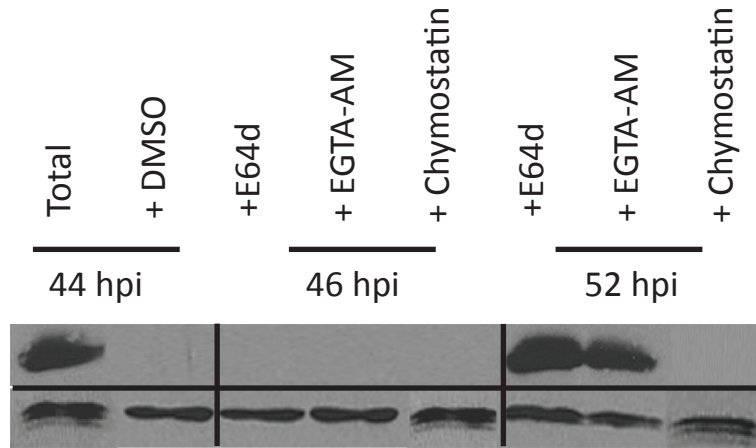

Supplement: pone.0020869.s002.pdf [file pone.0020869.s002.pdf]
